# Supplementary material for: Advanced tetracyclic heat-resistant energetic materials based on bis(4-nitropyrazole) bridged 1,2,4-triazole
Source: Royal Society of Chemistry journal article supplement (doi:10.1039/d4dt01627k), 2024-01-01
Supplement: d4dt01627k1.pdf [file d4dt01627k1.pdf]

# Supporting Information (SI)

## Advanced Tetracyclic Heat-resistant Energetic Materials Based on Bis (4-nitropyrazole) Bridged 1,2,4-triazole

Luyao Chen,<sup>a</sup> Wei Hu,<sup>a</sup> Chuan Xiao,<sup>b</sup> Caijin Lei,<sup>a</sup> Teng Zhu,<sup>a</sup> Chengchuang Li,<sup>a</sup> Jie Tang,<sup>a</sup>  
Guangbin Cheng,<sup>a\*</sup> and Hongwei Yang<sup>a\*</sup>

<sup>a</sup> School of Chemistry and Chemical Engineering, Nanjing University of Science and Technology,  
Nanjing, 210094, People's Republic of China.

<sup>b</sup> China Northern Industries Group Co., Ltd. (NORINCO GROUP), Beijing 100089, People's  
Republic of China.

\* Corresponding authors. Email: [gcheng@mail.njust.edu.cn](mailto:gcheng@mail.njust.edu.cn) (G. Cheng), [hyang@mail.njust.edu.cn](mailto:hyang@mail.njust.edu.cn)  
(H. Yang).

# Contents

|                                                                               |    |
|-------------------------------------------------------------------------------|----|
| 1. Experiment data .....                                                      | 1  |
| 2. Crystallographic data .....                                                | 4  |
| 3. Theoretical calculation .....                                              | 11 |
| 3.1 Heat of formation .....                                                   | 11 |
| 3.2. Non-isothermal decomposition kinetics analysis .....                     | 14 |
| 4. Mass spectrum of the prepared compound <b>3</b> .....                      | 16 |
| 5. <sup>15</sup> N NMR spectra of compound <b>3</b> .....                     | 16 |
| 6. <sup>1</sup> H and <sup>13</sup> C NMR spectra for all new compounds ..... | 16 |
| 7. IR Spectrum of the prepared compounds .....                                | 21 |
| 8. References .....                                                           | 24 |

## 1. Experiment data

**General:** The compounds in this work are energetic materials that could potentially explode under certain conditions (e.g., impact, friction, or electric discharge). Appropriate safety precautions, such as using shields in a fume hood and personal protection equipment (safety glasses, face shields, ear plugs, and gloves) should be taken at all times when handling these materials.

### General methods

Reagents were purchased from Aldrich and Acros Organics and are used as received.  $^1\text{H}$  and  $^{13}\text{C}$  NMR spectra are recorded on a 500 MHz (Bruker AVANCE 500) NMR spectrometer operating at 500 and 125 MHz, respectively. The decomposition points are obtained on a differential scanning calorimeter at a heating rate of  $5\text{ }^\circ\text{C min}^{-1}$ . IR spectra are recorded on an FT-IR spectrometer (Thermo Nicolet AVATAR 370) as thin films by using KBr plates. Densities are determined at  $25\text{ }^\circ\text{C}$  by employing a Micromeritics AccuPyc II 1340 gas pycnometer. Elemental analyses were carried out by using a Vario Micro cube Elementar Analyser. Impact and friction sensitivity measurements are made by using a standard BAM Fall hammer and a BAM friction tester. Detonation velocity and detonation pressure data are calculated by program package EXPLO5 (version 6.01).

**4,4'-dinitro-2H,2'H-[3,3'-bipyrazole]-5,5'-dicarboxylic acid (1)** was obtained according to the literature<sup>1</sup>.

**Dimethyl 4,4'-dinitro-2H,2'H-[3,3'-bipyrazole]-5,5'-dicarboxylate (2)** was obtained according to the literature<sup>1</sup>.

**Synthesis of 5,5'-(4,4'-dinitro-2H,2'H-[3,3'-bipyrazole]-5,5'-diyl)bis(4H-1,2,4-triazole-3,4-diamine) (3).**

Phosphorus pentoxide (4.0 g, 30.0 mmol) was added to aqueous phosphoric acid (85 wt%, 14.0 g, 120.0 mol) with portions, then heated to 40 – 50 °C under stirring. A mixture of compound **2** (3.1 g, 10.0 mmol) and diaminoguanidine monohydrochloride (3.3 g, 130.0 mmol) was added to the above solution with portions. Subsequently, the mixture was heated to 120 °C and reacted for another 8 h. Then, it was cooled to room temperature, and ice water (20.0 mL) was added. Adjust the pH of the mixed solution to 8 with a concentrated sodium hydroxide solution, precipitate, and filter. Wash the filter cake with cold water to obtain a light yellow compound **3**. (4.9 g, 73%). <sup>1</sup>H NMR (500 MHz, DMSO-d<sub>6</sub>): δ = 6.15 (s, 2H), 5.51 (s, 2H) ppm; <sup>13</sup>C NMR (125 MHz, DMSO-d<sub>6</sub>): δ = 156.09, 141.09, 135.88, 133.06, 131.52 ppm; <sup>15</sup>N NMR (50.7 MHz, DMSO-d<sub>6</sub>): -21.42, -110.81, -131.23, -194.93, -220.64, -250.32, -326.71, -336.26 ppm. IR (KBr):  $\tilde{\nu}$  = 3334, 3126, 1635, 1559, 1499, 1414, 1369, 1321, 1298, 1266, 1086, 995, 912, 816, 723, 711, 700 cm<sup>-1</sup>; HRMS (ESI-QTOF) m/z: [M+H]<sup>+</sup> Calcd for C<sub>10</sub>H<sub>10</sub>N<sub>16</sub>O<sub>4</sub> 418.1144; Found 418.1135; Elemental analysis for C<sub>10</sub>H<sub>10</sub>N<sub>16</sub>O<sub>4</sub> (418.30): C 28.71, H 2.41, N 53.58 %; Found: C 28.74, H 2.40, N 53.56 %.

**Synthesis of 5,5'-(4,4'-dinitro-2H,2'H-[3,3'-bipyrazole]-5,5'-diyl)bis(4H-1,2,4-triazole-3,4-diamine)-dichloride (5).**

Compound **3** (0.84 g, 2.0 mmol) was dispersed in 10.0 mL of water, then hydrochloric acid (5.0 mL, 2.0 mol/L) was added to the water. The mixture was

heated to 80 °C and stirred for 30 minutes until it became clear. Then the solution was cooled to room temperature and filtered to obtain salt **5**. Yield: 0.84 g, 85%. <sup>1</sup>H NMR (500 MHz, DMSO-*d*<sub>6</sub>): δ = 8.73 (s, 2H), 6.17 (s, 2H) ppm; <sup>13</sup>C NMR (125 MHz, DMSO-*d*<sub>6</sub>): δ = 151.96, 141.38, 132.87, 132.29, 130.36 ppm; IR (KBr):  $\tilde{\nu}$  = 3122, 2733, 1698, 1607, 1510, 1444, 1425, 1385, 1371, 1322, 1270, 1154, 1078, 1001, 963, 943, 832, 821, 790, 773 cm<sup>-1</sup>; Elemental analysis for C<sub>10</sub>H<sub>12</sub>Cl<sub>2</sub>N<sub>16</sub>O<sub>4</sub> (491.21): C 24.45, H 2.46, N 45.62 %; Found: C 24.40, H 2.48, N 45.65 %.

**Synthesis of 5,5'-(4,4'-dinitro-2H,2'H-[3,3'-bipyrazole]-5,5'-diyl)bis(4H-1,2,4-triazole-3,4-diamine)-dinitrate (6).**

Compound **3** (0.84 g, 2.0 mmol) was dispersed in 10.0 mL of water, then nitric acid (5.0 mL, 2.0 mol/L) was added to the water. The mixture was heated to 80 °C and stirred for 30 minutes until it became clear. Then the solution was cooled to room temperature and filtered to obtain salt **6**. Yield: 0.94 g, 86%. <sup>1</sup>H NMR (500 MHz, DMSO-*d*<sub>6</sub>): δ = 8.59 (s, 2H), 6.02 (s, 2H) ppm; <sup>13</sup>C NMR (125 MHz, DMSO-*d*<sub>6</sub>): δ = 152.05, 141.64, 133.03, 132.21, 130.50 ppm; IR (KBr):  $\tilde{\nu}$  = 3341, 2728, 1698, 1615, 1514, 1465, 1442, 1393, 1369, 1315, 1188, 1042, 1007, 974, 940, 821, 798, 772, 739 cm<sup>-1</sup>; Elemental analysis for C<sub>10</sub>H<sub>12</sub>N<sub>18</sub>O<sub>10</sub> (544.32): C 22.07, H 2.22, N 46.32 %; Found: C 22.03, H 2.25, N 46.33 %.

**Synthesis of 5,5'-(4,4'-dinitro-2H,2'H-[3,3'-bipyrazole]-5,5'-diyl)bis(4H-1,2,4-triazole-3,4-diamine)-diperchlorate (7).**

Compound **3** (0.84 g, 2.0 mmol) was dispersed in 10.0 mL of water, then perchloric acid (5.0 mL, 2.0 mol/L) was added to the water. The mixture was heated

to 80 °C and stirred for 30 minutes until it became clear. Then the solution was cooled to room temperature and filtered to obtain salt **7**. Yield: 1.0 g, 81%. <sup>1</sup>H NMR (500 MHz, DMSO-d<sub>6</sub>): δ = 8.58 (s, 2H), 5.99 (s, 2H) ppm; <sup>13</sup>C NMR (125 MHz, DMSO-d<sub>6</sub>): δ = 152.00, 141.63, 133.05, 132.18, 130.52 ppm; IR (KBr):  $\tilde{\nu}$  = 3217, 1679, 1622, 1545, 1506, 1423, 1371, 1329, 1065, 1001, 955, 897, 833, 775, 709 cm<sup>-1</sup>; Elemental analysis for C<sub>10</sub>H<sub>12</sub>Cl<sub>2</sub>N<sub>16</sub>O<sub>12</sub> (619.21): C 19.40, H 1.95, N 36.19 %; Found: C 19.43, H 1.93, N 36.18 %.

**Synthesis of 5,5'-(4,4'-dinitro-2H,2'H-[3,3'-bipyrazole]-5,5'-diyl)bis(4H-1,2,4-triazole-3,4-diamine)-dinitramide (**8**).**

1.23 g (2.5 mmol) of salt **5** was dissolved in 20.0 mL of water, then excess potassium dinitramide (0.73 g, 5.0 mmol) was added to the solution. The mixture was heated to 60 °C and stirred for 30 minutes until it became clear. Then the solution was cooled to room temperature and filtered to obtain salt **8**. Yield: 0.95g, 72%. <sup>1</sup>H NMR (500 MHz, DMSO-d<sub>6</sub>): δ = 8.63 (s, 2H), 6.09 (s, 2H) ppm; <sup>13</sup>C NMR (125 MHz, DMSO-d<sub>6</sub>): δ = 152.04, 141.51, 132.93, 132.10, 130.41 ppm; IR (KBr):  $\tilde{\nu}$  = 3305, 3241, 1698, 1515, 1474, 1455, 1433, 1363, 1316, 1265, 1203, 1144, 1104, 1083, 1022, 1004, 896, 834, 821, 796, 777, 734 cm<sup>-1</sup>; Elemental analysis for C<sub>10</sub>H<sub>12</sub>N<sub>22</sub>O<sub>12</sub> (632.35): C 18.99, H 1.91, N 48.73 %; Found: C 18.95, H 1.93, N 48.75 %.

## 2. Crystallographic data

The data for **3**•2DMSO•H<sub>2</sub>O and **7**•3H<sub>2</sub>O were collected with a Bruker SMART APEX II CCD diffractometer with graphite-monochromated Mo-Kα radiation (λ=0.71073 nm) at 170 K or 193 K. The data collection and the initial unit cell

refinement are performed by using APEX2 (v2010.3-0). Data Reduction is performed by using SAINT (v7.68A) and XPREP (v2008/2). Empirical absorption corrections are applied by using the SADABS (v2008/1) program. The structures are solved by direct methods and refined by the full matrix least-squares based on F2 using the SHELXTL--2014/7 (Sheldrick, 2014) program package. All non-hydrogen atoms were refined anisotropically. The hydrogen atoms attached to ligands are included using a riding model. The crystallographic data and CCDC numbers for these compounds are summarized in Table S1.

**Table S1.** Crystallographic data for **3•2DMSO•H<sub>2</sub>O** and **7•3H<sub>2</sub>O**.

| <b>Compound</b>                      | <b>3•2DMSO•H<sub>2</sub>O</b>                                                 | <b>7•3H<sub>2</sub>O</b>                                                        |
|--------------------------------------|-------------------------------------------------------------------------------|---------------------------------------------------------------------------------|
| <b>CCDC No.</b>                      | 2306698                                                                       | 2306703                                                                         |
| <b>Empirical Formula</b>             | C <sub>14</sub> H <sub>24</sub> N <sub>16</sub> O <sub>7</sub> S <sub>2</sub> | C <sub>10</sub> H <sub>18</sub> Cl <sub>2</sub> N <sub>16</sub> O <sub>15</sub> |
| <b>Formula weight</b>                | 592.61                                                                        | 673.30                                                                          |
| <b>Temperature (K)</b>               | 193.0                                                                         | 170.0                                                                           |
| <b>Crystal system</b>                | triclinic                                                                     | triclinic                                                                       |
| <b>Space group</b>                   | <i>P-1</i>                                                                    | <i>P-1</i>                                                                      |
| <b>a/Å</b>                           | 9.4496(9)                                                                     | 6.4237(4)                                                                       |
| <b>b/Å</b>                           | 11.7533(13)                                                                   | 11.3648(8)                                                                      |
| <b>c/Å</b>                           | 12.2973(13)                                                                   | 17.0298(12)                                                                     |
| <b>α/°</b>                           | 82.993(4)                                                                     | 100.454(2)                                                                      |
| <b>β/°</b>                           | 87.537(4)                                                                     | 98.960(2)                                                                       |
| <b>γ/°</b>                           | 68.954(3)                                                                     | 93.903(2)                                                                       |
| <b>Volume (Å<sup>3</sup>)</b>        | 1265.2(2)                                                                     | 1201.74(14)                                                                     |
| <b>Z</b>                             | 2                                                                             | 2                                                                               |
| <b>Density (g cm<sup>-3</sup>)</b>   | 1.556                                                                         | 1.861                                                                           |
| <b>μ (mm<sup>-1</sup>)</b>           | 0.282                                                                         | 0.308                                                                           |
| <b>F (000)</b>                       | 616.0                                                                         | 688.0                                                                           |
| <b>Crystal Size (mm<sup>3</sup>)</b> | 0.11 × 0.12 × 0.13                                                            | 0.12 × 0.08 × 0.05                                                              |
| <b>Wavelength (Å)</b>                | 0.71073                                                                       | 0.71073                                                                         |

|                                                                               |                                                                              |                                                                            |
|-------------------------------------------------------------------------------|------------------------------------------------------------------------------|----------------------------------------------------------------------------|
| <b>2<math>\theta</math> range for data collection (<math>^{\circ}</math>)</b> | 4.618 to<br>50.696                                                           | 3.998 to<br>52.92                                                          |
| <b>Index ranges</b>                                                           | -10 $\leq$ h $\leq$ 11,<br>-14 $\leq$ k $\leq$ 14,<br>-14 $\leq$ l $\leq$ 14 | -7 $\leq$ h $\leq$ 8,<br>-14 $\leq$ k $\leq$ 14,<br>-21 $\leq$ l $\leq$ 21 |
| <b>Reflections collected</b>                                                  | 17188                                                                        | 13836                                                                      |
| <b>Independent reflections</b>                                                | 4560<br>[Rint=0.0914,<br>Rsigma= 0.0755]                                     | 4909<br>[Rint = 0.0593,<br>Rsigma = 0.0781]                                |
| <b>Data/restraints/parameters</b>                                             | 4560/1036/410                                                                | 4909/9/427                                                                 |
| <b>Goodness-of-fit on F<sup>2</sup></b>                                       | 1.055                                                                        | 1.027                                                                      |
| <b>Final R indexes [I<math>\geq</math>2<math>\sigma</math> (I)]</b>           | R <sub>1</sub> = 0.0847,<br>wR <sub>2</sub> = 0.1660                         | R <sub>1</sub> = 0.0847,<br>wR <sub>2</sub> = 0.1985                       |
| <b>Final R indexes [all data]</b>                                             | R <sub>1</sub> = 0.1324,<br>wR <sub>2</sub> = 0.1962                         | R <sub>1</sub> = 0.1375,<br>wR <sub>2</sub> = 0.2377                       |
| <b>Largest diff. peak/hole/e <math>\text{\AA}^{-3}</math></b>                 | 0.82/-0.50                                                                   | 0.85/-0.75                                                                 |

**Table S2.** Bond lengths [ $\text{\AA}$ ] and angles [ $^{\circ}$ ] for **3•2DMSO•H<sub>2</sub>O**.

| <b>Parameter</b> | <b>Bond lengths [<math>\text{\AA}</math>]</b> | <b>Parameter</b> | <b>Bond lengths [<math>\text{\AA}</math>]</b> |
|------------------|-----------------------------------------------|------------------|-----------------------------------------------|
| O1-N6            | 1.242(7)                                      | N10-C7           | 1.324(8)                                      |
| O2-N6            | 1.230(6)                                      | N11-C8           | 1.331(8)                                      |
| O3-N9            | 1.226(6)                                      | N12-N13          | 1.399(7)                                      |
| O4-N9            | 1.233(6)                                      | N13-C9           | 1.372(7)                                      |
| O10-H10B         | 0.8700                                        | N13-C10          | 1.363(8)                                      |
| O10-H10A         | 0.8700                                        | N14-C9           | 1.303(7)                                      |
| N1-C1            | 1.334(7)                                      | N14-N15          | 1.412(7)                                      |
| N2-N3            | 1.392(6)                                      | N15-C10          | 1.317(8)                                      |
| N3-C2            | 1.376(7)                                      | N16-C10          | 1.362(8)                                      |
| N3-C1            | 1.365(7)                                      | N1-H1A           | 0.8800                                        |
| N4-N5            | 1.416(7)                                      | N1-H1B           | 0.8800                                        |
| N4-C1            | 1.323(7)                                      | N2-H2A           | 0.9000                                        |
| N5-C2            | 1.296(7)                                      | N2-H2B           | 0.8900                                        |
| N6-C4            | 1.408(7)                                      | N7-H7            | 0.8800                                        |
| N7-N8            | 1.362(6)                                      | N11-H11          | 0.8800                                        |
| N7-C3            | 1.338(8)                                      | N12-H12B         | 0.94(7)                                       |
| N8-C5            | 1.333(7)                                      | N12-H12A         | 0.8900                                        |
| N9-C6            | 1.425(8)                                      | N16-H16B         | 0.9000                                        |
| N10-N11          | 1.364(6)                                      | N16-H16A         | 0.85(5)                                       |
| C6-C7            | 1.396(7)                                      | C2-C3            | 1.473(8)                                      |
| C6-C8            | 1.391(7)                                      | C3-C4            | 1.392(7)                                      |



|          |          |       |          |
|----------|----------|-------|----------|
| C8-C9    | 1.462(7) | C4-C5 | 1.407(8) |
| C11-H11C | 0.9800   | C5-C7 | 1.486(7) |
| C11-H11B | 0.9800   |       |          |

| Parameter     | Bond angles [°] | Parameter     | Bond angles [°] |
|---------------|-----------------|---------------|-----------------|
| O5-S1-C11     | 107.7(4)        | N15-N14-C9    | 107.6(4)        |
| O5-S1-C12     | 105.9(3)        | N14-N15-C10   | 106.1(5)        |
| C11-S1-C12    | 98.5(4)         | H1A-N1-H1B    | 120.00          |
| C13-S2-C14    | 98.5(5)         | C1-N1-H1A     | 120.00          |
| O6-S2-C13     | 105.4(5)        | C1-N1-H1B     | 120.00          |
| O6-S2-C14     | 106.1(5)        | N3-N2-H2A     | 111.00          |
| O6A-S2A-C14A  | 104.8(9)        | H2A-N2-H2B    | 108.00          |
| O6A-S2A-C13A  | 106.6(9)        | N3-N2-H2B     | 110.00          |
| C13A-S2A-C14A | 96.6(10)        | N8-N7-H7      | 123.00          |
| H10A-O10-H10B | 105.00          | C3-N7-H7      | 123.00          |
| N2-N3-C2      | 131.2(4)        | C8-N11-H11    | 123.00          |
| N2-N3-C1      | 123.9(4)        | N10-N11-H11   | 123.00          |
| C1-N3-C2      | 104.9(4)        | H12A-N12-H12B | 108.00          |
| N5-N4-C1      | 106.7(4)        | N13-N12-H12A  | 109.00          |
| N4-N5-C2      | 106.9(4)        | N13-N12-H12B  | 108(4)          |
| O1-N6-C4      | 118.7(5)        | C10-N16-H16A  | 112(4)          |
| O2-N6-C4      | 119.1(5)        | C10-N16-H16B  | 111.00          |
| O1-N6-O2      | 122.3(5)        | H16A-N16-H16B | 134.00          |
| N8-N7-C3      | 113.2(4)        | N1-C1-N3      | 122.8(5)        |
| N7-N8-C5      | 104.9(4)        | N3-C1-N4      | 110.3(5)        |
| O3-N9-O4      | 122.9(5)        | N1-C1-N4      | 126.9(5)        |
| O3-N9-C6      | 118.1(5)        | N3-C2-C3      | 125.3(5)        |
| O4-N9-C6      | 119.0(5)        | N5-C2-C3      | 123.5(5)        |
| N11-N10-C7    | 105.2(4)        | N3-C2-N5      | 111.2(5)        |
| N10-N11-C8    | 113.3(4)        | N7-C3-C4      | 105.6(5)        |
| N12-N13-C10   | 122.3(5)        | N7-C3-C2      | 121.6(5)        |
| N12-N13-C9    | 132.1(5)        | C2-C3-C4      | 132.7(5)        |
| C9-N13-C10    | 105.1(5)        | C3-C4-C5      | 105.8(5)        |

**Table S3.** Hydrogen bonds present in  $3 \cdot 2\text{DMSO} \cdot \text{H}_2\text{O}$ .

| D-H...A      | d(D-H)/Å | d(H...A)/Å | d(D...A)/Å | <(DHA) <sup>o</sup> |
|--------------|----------|------------|------------|---------------------|
| N1-H1A...N15 | 0.8800   | 2.0900     | 2.961(7)   | 174.00              |
| N1-H1B...N2  | 0.8800   | 2.5700     | 2.865(7)   | 100.00              |
| N1-H1B...N14 | 0.8800   | 2.1800     | 2.999(6)   | 154.00              |

|                |         |         |           |        |
|----------------|---------|---------|-----------|--------|
| N2-H2A···O6    | 0.9000  | 2.0900  | 2.922(10) | 154.00 |
| N2-H2B···O1    | 0.8900  | 2.3600  | 3.031(6)  | 132.00 |
| N2-H2B···O2    | 0.8900  | 2.5300  | 3.002(6)  | 114.00 |
| N7-H7···N4     | 0.8800  | 1.9600  | 2.842(7)  | 174.00 |
| O10-H10A···O6  | 0.8700  | 2.3900  | 2.766(10) | 107.00 |
| O10-H10B···O6  | 0.8700  | 2.3000  | 2.766(10) | 114.00 |
| N11-H11···O5   | 0.8800  | 1.7900  | 2.647(7)  | 162.00 |
| N12-H12A···N10 | 0.8900  | 2.1900  | 3.053(7)  | 163.00 |
| N12-H12B···O4  | 0.94(7) | 2.39(6) | 3.054(6)  | 128(5) |
| N12-H12B···O3  | 0.94(7) | 2.15(7) | 2.941(7)  | 142(5) |
| N16-16A···N12  | 0.85(5) | 2.45(5) | 2.852(8)  | 110(4) |
| N16-H16B···O10 | 0.9000  | 2.3000  | 3.028(9)  | 138.00 |
| C11-H11A···O10 | 0.9800  | 2.5500  | 3.443(10) | 152.00 |
| C12-H12E···O4  | 0.9800  | 2.4000  | 3.268(8)  | 147.00 |
| C13-H13B···O1  | 0.9800  | 2.4700  | 3.402(12) | 158.00 |

**Table S4.** Torsion angles of compound **3**•2DMSO•H<sub>2</sub>O.

| parameter   | Å         | parameter       | Å         |
|-------------|-----------|-----------------|-----------|
| C2-N3-C1-N4 | 1.7(6)    | N11-N10-C7-C6   | 0.3(5)    |
| N2-N3-C1-N1 | 4.1(9)    | N10-N11-C8-C9   | 175.9(4)  |
| C2-N3-C1-N1 | -176.7(5) | N10-N11-C8-C6   | -1.1(5)   |
| N2-N3-C2-N5 | 177.6(5)  | C9-N13-C10-N16  | 179.3(6)  |
| C1-N3-C2-C3 | -179.7(5) | N12-N13-C10-N15 | -173.4(5) |
| C1-N3-C2-N5 | -1.5(6)   | C10-N13-C9-C8   | -179.2(6) |
| N2-N3-C1-N4 | -177.5(5) | C10-N13-C9-N14  | 0.7(7)    |
| N2-N3-C2-C3 | -0.6(9)   | N12-N13-C9-N14  | 171.9(6)  |
| N5-N4-C1-N1 | 177.0(6)  | N12-N13-C9-C8   | -8.0(10)  |
| N5-N4-C1-N3 | -1.3(6)   | C9-N13-C10-N15  | -1.1(7)   |
| C1-N4-N5-C2 | 0.4(6)    | N12-N13-C10-N16 | 7.0(10)   |
| N4-N5-C2-C3 | 179.0(5)  | C9-N14-N15-C10  | -0.6(7)   |
| N4-N5-C2-N3 | 0.7(6)    | N15-N14-C9-N13  | -0.1(6)   |
| O2-N6-C4-C5 | -14.1(8)  | N15-N14-C9-C8   | 179.8(5)  |
| O1-N6-C4-C3 | -13.3(9)  | N14-N15-C10-N16 | -179.4(6) |
| O1-N6-C4-C5 | 165.3(5)  | N14-N15-C10-N13 | 1.1(7)    |
| O2-N6-C4-C3 | 167.3(5)  | N5-C2-C3-N7     | -51.0(9)  |
| C3-N7-N8-C5 | 0.8(6)    | N3-C2-C3-C4     | -57.8(10) |
| N8-N7-C3-C2 | 175.3(5)  | N3-C2-C3-N7     | 127.0(6)  |
| N8-N7-C3-C4 | -1.1(6)   | N5-C2-C3-C4     | 124.3(7)  |
| N7-N8-C5-C7 | -177.3(5) | C2-C3-C4-N6     | 3.9(10)   |

|               |          |             |           |
|---------------|----------|-------------|-----------|
| N7-N8-C5-C4   | -0.2(6)  | C2-C3-C4-C5 | -174.9(6) |
| O3-N9-C6-C7   | -12.7(8) | N7-C3-C4-C5 | 0.9(6)    |
| O4-N9-C6-C8   | -7.6(7)  | N7-C3-C4-N6 | 179.7(5)  |
| O3-N9-C6-C8   | 173.8(5) | N6-C4-C5-C7 | -2.5(10)  |
| O4-N9-C6-C7   | 165.9(5) | N6-C4-C5-N8 | -179.2(5) |
| C7-N10-N11-C8 | 0.5(5)   | C3-C4-C5-N8 | -0.4(6)   |
| N11-N10-C7-C5 | 177.7(4) | C3-C4-C5-C7 | 176.3(5)  |

**Table S5.** Bond lengths [ $\text{\AA}$ ] and angles [ $^\circ$ ] for  $7\cdot 3\text{H}_2\text{O}$ .

| Parameter | Bond lengths [ $\text{\AA}$ ] | Parameter | Bond lengths [ $\text{\AA}$ ] |
|-----------|-------------------------------|-----------|-------------------------------|
| Cl2-O13   | 1.356(5)                      | N9-C7     | 1.424(7)                      |
| Cl2-O14   | 1.365(5)                      | N10-N11   | 1.341(7)                      |
| Cl2-O15   | 1.367(5)                      | N10-C6    | 1.336(7)                      |
| Cl2-O16   | 1.684(7)                      | N11-C8    | 1.323(7)                      |
| Cl2-O12   | 1.707(7)                      | N12-N16   | 1.388(7)                      |
| C11-O2    | 1.423(8)                      | N12-C9    | 1.377(7)                      |
| C11-O3    | 1.345(7)                      | N12-C10   | 1.358(7)                      |
| C11-O1    | 1.455(10)                     | N13-N14   | 1.383(7)                      |
| C11-O4    | 1.360(9)                      | N13-C9    | 1.303(7)                      |
| O5-N8     | 1.230(6)                      | N14-C10   | 1.317(8)                      |
| O6-N8     | 1.222(6)                      | N15-C10   | 1.333(8)                      |
| O7-N9     | 1.230(6)                      | N1-H1B    | 0.8800                        |
| O8-N9     | 1.233(6)                      | N1-H1A    | 0.8800                        |
| O9-H9A    | 0.8700                        | N3-H3A    | 0.87(5)                       |
| O9-H9B    | 0.8700                        | N3-H3B    | 0.85(3)                       |
| O10-H10B  | 0.86(7)                       | N4-H4     | 0.8800                        |
| O10-H10A  | 0.8700                        | N7-H7     | 0.8800                        |
| N1-C1     | 1.319(7)                      | N10-H10   | 0.86(5)                       |
| N2-N3     | 1.400(6)                      | O11-H11B  | 0.88(5)                       |
| N2-C2     | 1.379(7)                      | O11-H11A  | 0.8700                        |
| N2-C1     | 1.347(6)                      | N14-H14   | 0.8800                        |
| N4-N5     | 1.372(5)                      | N15-H15B  | 0.8800                        |
| N4-C1     | 1.330(6)                      | N15-H15A  | 0.8800                        |
| N5-C2     | 1.297(6)                      | N16-H16B  | 0.8900                        |
| N6-N7     | 1.344(5)                      | N16-H16A  | 0.8900                        |
| N6-C3     | 1.341(6)                      | C2-C3     | 1.460(7)                      |
| N7-C5     | 1.344(7)                      | C3-C4     | 1.389(7)                      |

|                  |                        |                  |                        |
|------------------|------------------------|------------------|------------------------|
| N8-C4            | 1.424(7)               | C4-C5            | 1.390(7)               |
| <b>Parameter</b> | <b>Bond angles [°]</b> | <b>Parameter</b> | <b>Bond angles [°]</b> |
| O14-C12-O16      | 89.4(4)                | O7-N9-O8         | 123.8(5)               |
| O12-C12-O16      | 179.3(4)               | O7-N9-C7         | 118.6(5)               |
| O13-C12-O14      | 119.9(3)               | O8-N9-C7         | 117.6(5)               |
| O13-C12-O15      | 120.4(3)               | N11-N10-C6       | 113.9(5)               |
| O13-C12-O16      | 91.4(4)                | N10-N11-C8       | 105.0(4)               |
| H9A-O9-H9B       | 104.00                 | N16-N12-C10      | 126.7(5)               |
| H10A-O10-H10B    | 104.00                 | C9-N12-C10       | 106.7(5)               |
| C1-N2-C2         | 107.1(4)               | N16-N12-C9       | 126.5(5)               |
| N3-N2-C1         | 122.7(4)               | N14-N13-C9       | 103.9(4)               |
| N3-N2-C2         | 130.2(4)               | N13-N14-C10      | 112.2(5)               |
| N5-N4-C1         | 112.9(4)               | H1A-N1-H1B       | 120.00                 |
| N4-N5-C2         | 103.5(4)               | C1-N1-H1B        | 120.00                 |
| N7-N6-C3         | 109.5(4)               | C1-N1-H1A        | 120.00                 |
| N6-N7-C5         | 108.9(4)               | H3A-N3-H3B       | 108(5)                 |
| O5-N8-C4         | 117.6(4)               | N2-N3-H3A        | 107(4)                 |
| O6-N8-C4         | 118.4(5)               | N2-N3-H3B        | 106(5)                 |
| O5-N8-O6         | 124.1(5)               | N5-N4-H4         | 124.00                 |

**Table S6.** Hydrogen bonds present in  $7 \cdot 3\text{H}_2\text{O}$ .

| <b>D-H...A</b> | <b>d(D-H)/Å</b> | <b>d(H...A)/Å</b> | <b>d(D...A)/Å</b> | <b>&lt;(DHA)°</b> |
|----------------|-----------------|-------------------|-------------------|-------------------|
| N1-H1A...O3    | 0.8800          | 2.5600            | 3.136(9)          | 124.00            |
| N1-H1A...O11   | 0.8800          | 2.3900            | 3.077(7)          | 135.00            |
| N1-H1B...N5    | 0.8800          | 2.3200            | 3.135(6)          | 154.00            |
| N3-H3A...O7    | 0.87(5)         | 2.51(4)           | 3.291(6)          | 149(5)            |
| N3-H3B...O16   | 0.85(3)         | 2.36(4)           | 3.090(10)         | 146(6)            |
| N4-H4...O3     | 0.8800          | 2.0500            | 2.735(8)          | 134.00            |
| N4-H4...O11    | 0.8800          | 2.4600            | 3.088(6)          | 129.00            |
| N7-H7...O15    | 0.8800          | 2.2900            | 3.064(6)          | 146.00            |
| N7-H7...N6     | 0.8800          | 2.2500            | 2.875(6)          | 128.00            |
| O9-H9A...O10   | 0.8700          | 2.3200            | 2.929(9)          | 127.00            |
| O9-H9B...N1    | 0.8700          | 2.4700            | 3.275(8)          | 154.00            |
| N10-H10...O9   | 0.86(5)         | 2.32(5)           | 2.903(8)          | 125(5)            |
| N10-H10...O12  | 0.86(5)         | 2.44(5)           | 3.045(10)         | 128(5)            |
| N10-H10...O14  | 0.86(5)         | 2.21(6)           | 3.013(7)          | 154(5)            |

|               |         |         |           |        |
|---------------|---------|---------|-----------|--------|
| O10-10A···O12 | 0.8700  | 1.8800  | 2.685(10) | 153.00 |
| O10-10B···O11 | 0.86(7) | 1.90(6) | 2.698(9)  | 155(8) |
| O11-H11B···O2 | 0.88(5) | 2.01(6) | 2.881(9)  | 167(4) |
| N14-H14···O10 | 0.8800  | 1.8500  | 2.682(7)  | 158.00 |
| N15-H15A···O9 | 0.8800  | 2.1200  | 2.945(8)  | 155.00 |
| N15-15B···N13 | 0.8800  | 2.4900  | 3.366(7)  | 171.00 |
| N16-16A···N11 | 0.8800  | 2.5400  | 3.129(7)  | 125.00 |
| N16-H16B···O4 | 0.8900  | 2.1700  | 2.938(11) | 145.00 |

**Table S7.** Torsion angles of compound **7**·3H<sub>2</sub>O.

| parameter   | Å         | parameter     | Å         |
|-------------|-----------|---------------|-----------|
| N3-N2-C1-N1 | 1.4(8)    | N7-N6-C3-C2   | 179.4(4)  |
| N3-N2-C1-N4 | 178.7(4)  | N7-N6-C3-C4   | 0.1(5)    |
| C2-N2-C1-N1 | -177.4(5) | N6-N7-C5 -C4  | -0.3(5)   |
| C2-N2-C1-N4 | -0.1(5)   | N6-N7-C5-C6   | -174.1(4) |
| N3-N2-C2-N5 | -178.5(5) | O5-N8-C4-C3   | 2.3(8)    |
| N3-N2-C2-C3 | -4.0(8)   | O5-N8-C4-C5   | 179.2(5)  |
| C1-N2-C2-N5 | 0.1(6)    | O6-N8-C4-C3   | -177.0(5) |
| C1-N2-C2-C3 | 174.7(4)  | O6-N8-C4-C5   | -0.1(8)   |
| C1-N4-N5-C2 | 0.1(6)    | O7-N9-C7-C6   | 5.2(8)    |
| N5-N4-C1-N1 | 177.3(5)  | O7-N9-C7-C8   | -172.8(5) |
| N5-N4-C1-N2 | 0.0(6)    | O8-N9-C7-C6   | -174.2(5) |
| N4-N5-C2-N2 | -0.1(5)   | O8-N9-C7-C8   | 7.9(8)    |
| N4-N5-C2-C3 | -174.7(4) | C6-N10-N11-C8 | 0.6(6)    |
| C3-N6-N7-C5 | 0.2(5)    | N11-N10-C6-C5 | 177.5(5)  |

### 3. Theoretical calculation

#### 3.1 Heat of formation

Theoretical calculations were performed by using the Gaussian 09 (Revision D.01) suite of programs<sup>2</sup>. The elementary geometric optimization and the frequency analysis were performed at the level of the Becke three parameter, Lee-Yan-Parr (B3LYP)<sup>3</sup> functional with the 6-311+G\*\* basis set<sup>4</sup>. All of the optimized structures were characterized to be local energy minima on the potential surface without any imaginary frequencies. Atomization energies were calculated by the

CBS-4M<sup>5</sup>. All the optimized structures were characterized to be true local energy minima on the potential-energy surface without imaginary frequencies<sup>6</sup>.

The heat of formation (HOF) predictions adopts the hybrid DFT-B3LYP methods with 6-311+G\*\* basis set via designed isodesmic reactions. The isodesmic reaction processes, i.e., the number of each kind of formal bond is conserved, are used to apply the bond separation reaction (BSR) rules. The molecule is broken down into a set of two heavy-atom molecules containing the same component bonds. The isodesmic reactions used to derive the  $\Delta H_f$  of the title compounds are in Fig. S1. In addition, detailed information (such as ZPE, E0, and  $\Delta H_T$ ) of the related small molecules is provided in Table S11.

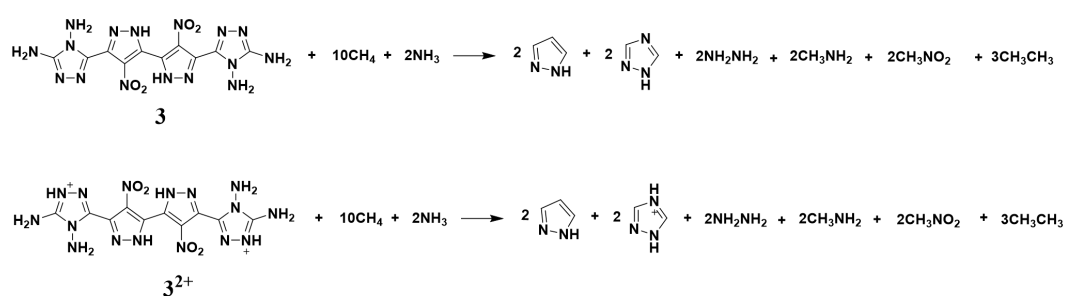

**Fig. S1.** Isodesmic reactions for compounds **3** and **3<sup>2+</sup>**.

**Table S8.** Ab initio computational values of small molecules used in isodesmic and tautomeric reactions.

| Compound                            | E <sub>0</sub> <sup>a</sup> (kJ/mol) | ZPE <sup>b</sup> (kJ/mol) | H <sub>T</sub> <sup>c</sup> (kJ/mol) | HOF <sup>d</sup> (kJ/mol) |
|-------------------------------------|--------------------------------------|---------------------------|--------------------------------------|---------------------------|
| <b>3</b>                            | -1563.91                             | 678.83                    | 44.29                                | 1488.91                   |
| <b>3<sup>2+</sup></b>               | -1564.74                             | 750.28                    | 43.24                                | 2228.52                   |
| <b>CH<sub>4</sub></b>               | -40.53                               | 112.26                    | 10.04                                | -74.60                    |
| <b>NH<sub>3</sub></b>               | -56.58                               | 86.27                     | 10.05                                | -45.90                    |
| <b>NH<sub>2</sub>NH<sub>2</sub></b> | -111.91                              | 134.28                    | 11.16                                | 95.40                     |
| <b>CH<sub>3</sub>NH<sub>2</sub></b> | -95.89                               | 160.78                    | 11.64                                | -22.50                    |
| <b>CH<sub>3</sub>NO<sub>2</sub></b> | -245.09                              | 124.93                    | 11.60                                | -80.80                    |
| <b>CH<sub>3</sub>CH<sub>3</sub></b> | -79.86                               | 187.31                    | 11.79                                | -84.00                    |

|                                                                                   |         |        |       |        |
|-----------------------------------------------------------------------------------|---------|--------|-------|--------|
|  | -226.26 | 179.20 | 12.57 | 177.40 |
|  | -242.32 | 150.39 | 12.06 | 192.70 |
|  | -242.66 | 184.02 | 12.27 | 831.72 |

<sup>a</sup> Total energy calculated by B3LYP/6-311+G\*\* method (a.u). <sup>b</sup> zero-point correction (kJ mol<sup>-1</sup>). <sup>c</sup> thermal correction to enthalpy (kJ mol<sup>-1</sup>). <sup>d</sup> heat of formation (kJ mol<sup>-1</sup>, gas).

The change of enthalpy for the reactions at 298 K can be expressed as Equation 1

$$\Delta H_{298} = \sum \Delta_i H_P - \sum \Delta_i H_R \quad (\text{Equation 1})$$

Where  $\sum \Delta_i H_P$  and  $\sum \Delta_i H_R$  are the HOF of reactants and products at 298 K, respectively, and  $\Delta H_{298}$  can be calculated using the following expression:

$$\Delta H_{298} = \Delta E_{298} + \Delta(PV) = \Delta E_0 + \Delta ZPE + \Delta H_T + \Delta nRT \quad (\text{Equation 2})$$

Where  $\Delta E_0$  is the change in total energy between the products and the reactants at 0 K;  $\Delta ZPE$  is the difference between the zero-point energies (*ZPE*) of the products and the reactants at 0 K;  $\Delta H_T$  is a thermal correction from 0 to 298 K. The  $\Delta(PV)$  value in Equation 2 is the PV work term. It equals  $\Delta(nRT)$  for the reactions of an ideal gas. For the isodesmic reaction,  $\Delta n = 0$ , so  $\Delta(PV) = 0$ . On the left side of Equation 1, apart from the target compound, all the others are called reference compounds. The HOF of reference compounds is available from experiments or high-level computing such as CBS-4M. For the solid phase species, enthalpies of formation  $\Delta H_f$  (s) were calculated as follows:

$$\Delta H_{\text{sub}} = aA^2 + b\sqrt{v\sigma_{\text{tot}}^2} + c \quad (\text{Equation 3})$$

$$\Delta H_f(\text{s}) = \Delta H_f(\text{g}) - \Delta H_{\text{sub}} \quad (\text{Equation 4})$$

$\Delta H_{\text{sub}}$  = sublimation enthalpy;  $\Delta H_f(\text{g})$  = the heats of formation for gas-phase;  $\Delta H_f(\text{s})$  = the heats of formation for solid-phase; A = the molecular surface area; a = 0.000267; b = 1.650087; c

= 2.966078.

For energetic salts (**6-8**), the solid-phase enthalpy of formation is obtained using a Born-Haber energy cycle<sup>7-8</sup>.

The sublimation enthalpy, the gas- and solid-phase heats of formation of **3**, **6**, **7**, and **8** were calculated below<sup>9-10</sup>:

**Table S9.** The Heats of Formation for Gas-, Solid-Phase, and Heats of Phase Change for Series of compounds **3**, **6**, **7**, and **8**.

| Compound | $\Delta H_{sub}/\text{kJ}\cdot\text{mol}^{-1}$ | $\Delta H_f(\text{g})/\text{kJ}\cdot\text{mol}^{-1}$ | $\Delta H_f(\text{s})/\text{kJ}\cdot\text{mol}^{-1}$ |
|----------|------------------------------------------------|------------------------------------------------------|------------------------------------------------------|
| <b>3</b> | 96.2                                           | 1488.9                                               | 1392.7                                               |
| <b>6</b> | 66.5                                           | 626.0                                                | 559.5                                                |
| <b>7</b> | 54.4                                           | 690.4                                                | 636.0                                                |
| <b>8</b> | 72.0                                           | 1083.1                                               | 1011.1                                               |

### 3.2. Non-isothermal decomposition kinetics analysis

The Kissinger (Equation 5) and Ozawa (Equation 6) methods are as follows:

$$\ln \frac{\beta}{T_p^2} = \ln \frac{AR}{E_k} - \frac{E_k}{RT_p} \quad (\text{Equation 5})$$

$$\lg \beta + \frac{0.4567E_o}{RT_p} = C \quad (\text{Equation 6})$$

In which  $\beta$  is the heating rate;  $T_p$  is the peak temperature (K);  $A$  is the pre-exponential factor ( $\text{s}^{-1}$ );  $R$  is the gas constant ( $8.314 \text{ J K}^{-1} \text{ mol}^{-1}$ );  $E_k$  and  $E_o$  are the apparent activation energy calculated from Kissinger and Ozawa methods, respectively ( $\text{kJ mol}^{-1}$ );  $C$  is a constant.

To obtain additional kinetic parameters such as extrapolated peak temperature while  $\beta \rightarrow 0$  ( $T_{p0}$ ), the corresponding critical temperature of thermal explosion ( $T_b$ ), entropy of activation ( $\Delta S^\ddagger$ ), enthalpy of activation ( $\Delta H^\ddagger$ ), Gibbs free energy of activation ( $\Delta G^\ddagger$ ), equations 7-11 were employed, where  $k_B$  is the Boltzmann constant ( $1.381 \times 10^{-23} \text{ J}\cdot\text{K}^{-1}$ ),  $h$  is the Planck constant



$(6.626 \times 10^{-34} \text{ J}\cdot\text{s})$ .

$$T_{pi} = T_{p0} + a\beta_i + b\beta_i^2 + c\beta_i^3, \quad i = 1, 2, 3, 4 \quad (\text{Equation 7})$$

$$A = (k_B T_{p0}/h) \exp(1 + \Delta S^\ddagger/R) \quad (\text{Equation 8})$$

$$\Delta H^\ddagger = E_k - RT_{p0} \quad (\text{Equation 9})$$

$$\Delta G^\ddagger = \Delta H^\ddagger - T_{p0} \Delta S^\ddagger \quad (\text{Equation 10})$$

$$T_b = \frac{E_k - \sqrt{E_k^2 - 4E_k RT_{p0}}}{2R} \quad (\text{Equation 11})$$

**Table S10.** The calculated heating rate ( $\beta$ ), peak decomposition temperature ( $T_p$ ), apparent activation energy (Kissinger,  $E_k$ ; Ozawa,  $E_o$ ), linear correlation coefficient (Kissinger,  $r_k$ ; Ozawa,  $r_o$ ) and pre-exponential constant (Kissinger,  $\ln A_k$ ).

| Compd       | $\beta$<br>( $^\circ\text{C min}^{-1}$ ) | $T_p$<br>( $^\circ\text{C}$ ) | $E_k$<br>( $\text{kJ mol}^{-1}$ ) | $\ln A_k$<br>( $\text{s}^{-1}$ ) | $r_k$  | $E_o$<br>( $\text{kJ mol}^{-1}$ ) | $r_o$  |
|-------------|------------------------------------------|-------------------------------|-----------------------------------|----------------------------------|--------|-----------------------------------|--------|
| <b>3</b>    | 5                                        | 341.25                        | 296.65                            | 32.14                            | 0.9946 | 291.93                            | 0.9945 |
|             | 10                                       | 348.36                        |                                   |                                  |        |                                   |        |
|             | 15                                       | 353.15                        |                                   |                                  |        |                                   |        |
|             | 20                                       | 355.75                        |                                   |                                  |        |                                   |        |
| <b>HNS</b>  | 5                                        | 332.30                        | 197.61                            | 32.95                            | 0.9971 | 197.76                            | 0.9974 |
|             | 10                                       | 340.70                        |                                   |                                  |        |                                   |        |
|             | 15                                       | 351.60                        |                                   |                                  |        |                                   |        |
|             | 20                                       | 364.10                        |                                   |                                  |        |                                   |        |
| <b>TATB</b> | 5                                        | 368.00                        | 211.40                            | 38.48                            | 0.9996 | 211.34                            | 0.9994 |
|             | 10                                       | 379.10                        |                                   |                                  |        |                                   |        |
|             | 15                                       | 385.70                        |                                   |                                  |        |                                   |        |
|             | 20                                       | 389.90                        |                                   |                                  |        |                                   |        |

**Table S11.** The calculated Extrapolated peak temperature ( $T_{p0}$ ), activation entropy ( $\Delta S^\ddagger$ ), activation enthalpy ( $\Delta H^\ddagger$ ), activation Gibbs free energy ( $\Delta G^\ddagger$ ) and the critical temperature of thermal explosion ( $T_b$ ).

| Compd | $T_{p0}$ ( $^\circ\text{C}$ ) | $\Delta S^\ddagger$ ( $\text{J mol}^{-1} \text{ K}^{-1}$ ) | $\Delta H^\ddagger$ ( $\text{kJ mol}^{-1}$ ) | $\Delta G^\ddagger$ ( $\text{kJ mol}^{-1}$ ) | $T_b$ ( $^\circ\text{C}$ ) |
|-------|-------------------------------|------------------------------------------------------------|----------------------------------------------|----------------------------------------------|----------------------------|
|-------|-------------------------------|------------------------------------------------------------|----------------------------------------------|----------------------------------------------|----------------------------|

|             |        |       |        |        |        |
|-------------|--------|-------|--------|--------|--------|
| <b>3</b>    | 331.69 | 8.11  | 291.62 | 286.72 | 342.30 |
| <b>HNS</b>  | 324.32 | 18.77 | 192.67 | 181.42 | 340.13 |
| <b>TATB</b> | 350.30 | 68.9  | 206.1  | 163.1  | 366.39 |

#### 4. Mass spectrum of the prepared compound 3

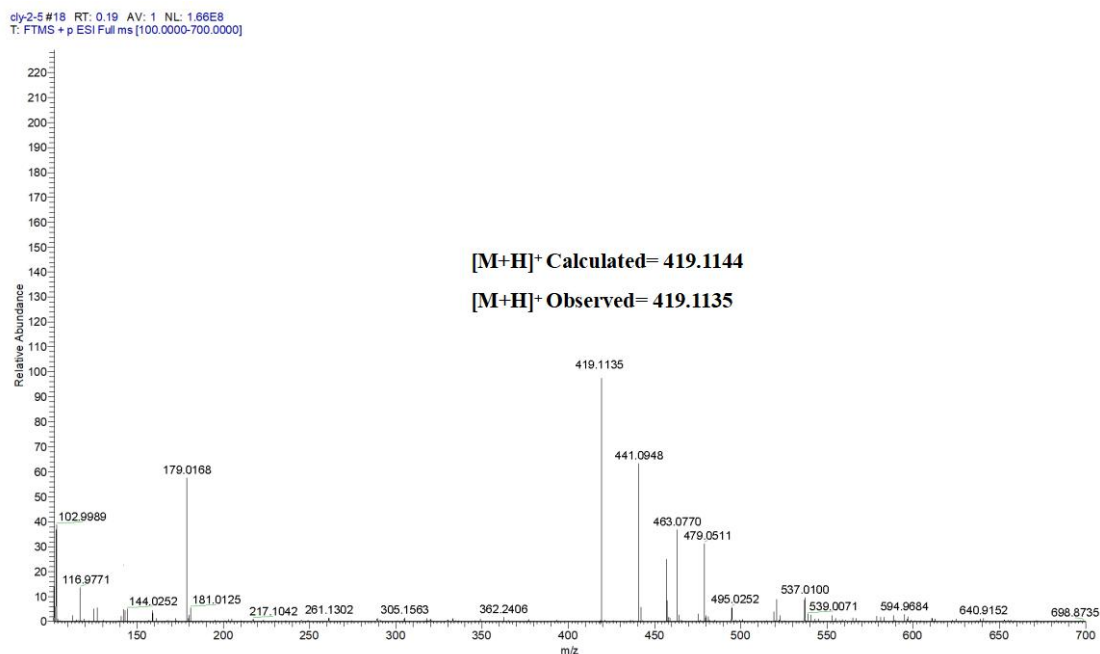

Fig. S2. Mass spectrum of compound 3.

#### 5. <sup>15</sup>N NMR spectra of compound 3

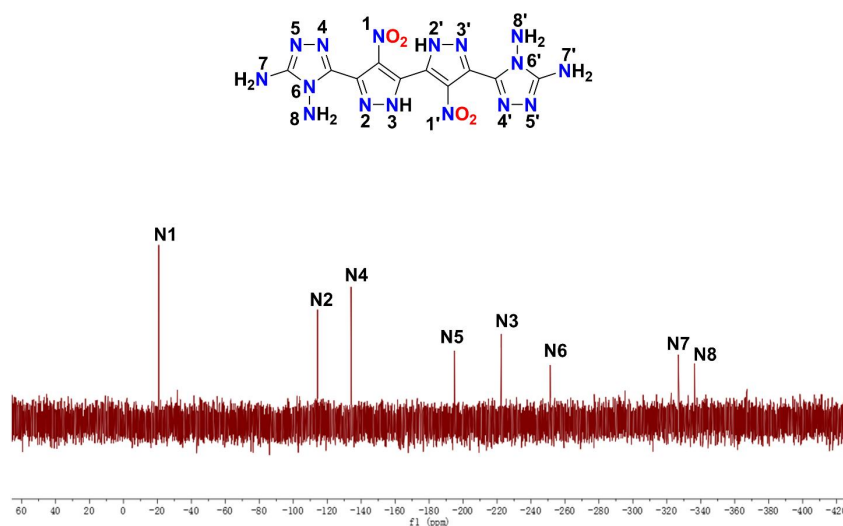

Fig. S3. <sup>15</sup>N NMR spectra (50.7 MHz) of compound 3 in DMSO-*d*<sub>6</sub>.

#### 6. <sup>1</sup>H and <sup>13</sup>C NMR spectra for all new compounds

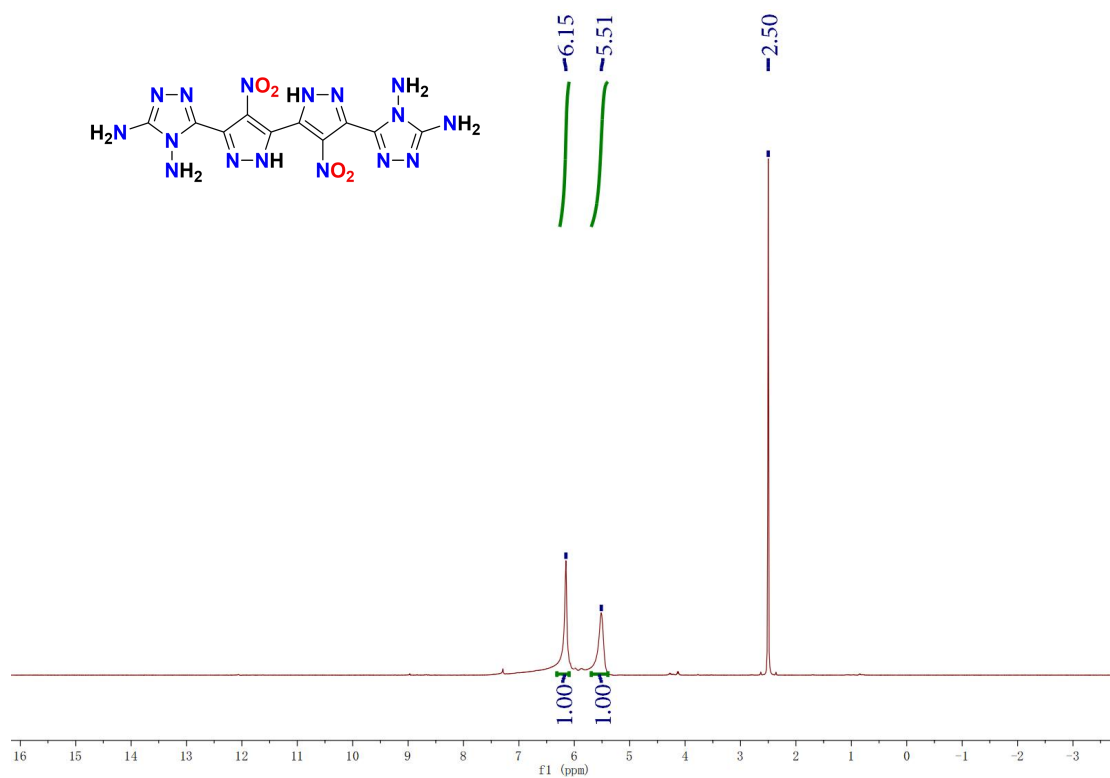

Fig. S4.  $^1\text{H}$  NMR spectrum of **3** in  $\text{DMSO-}d_6$ .

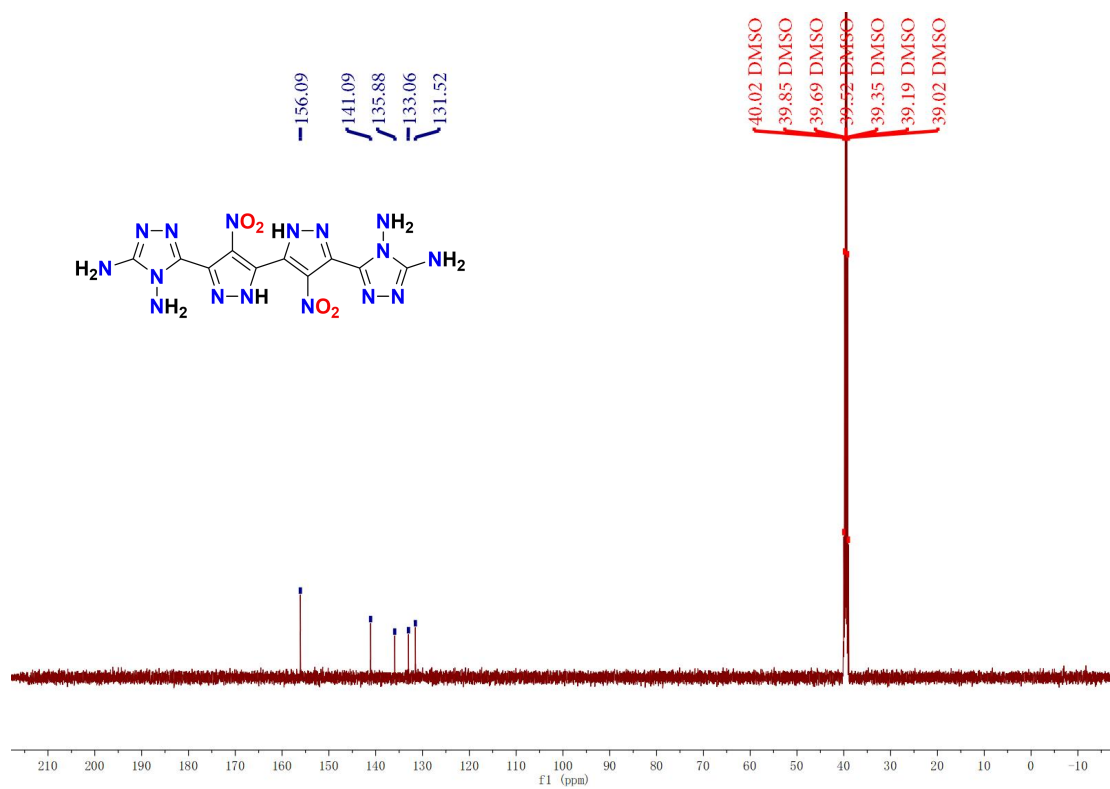

Fig. S5.  $^{13}\text{C}$  NMR spectrum of **3** in  $\text{DMSO-}d_6$ .

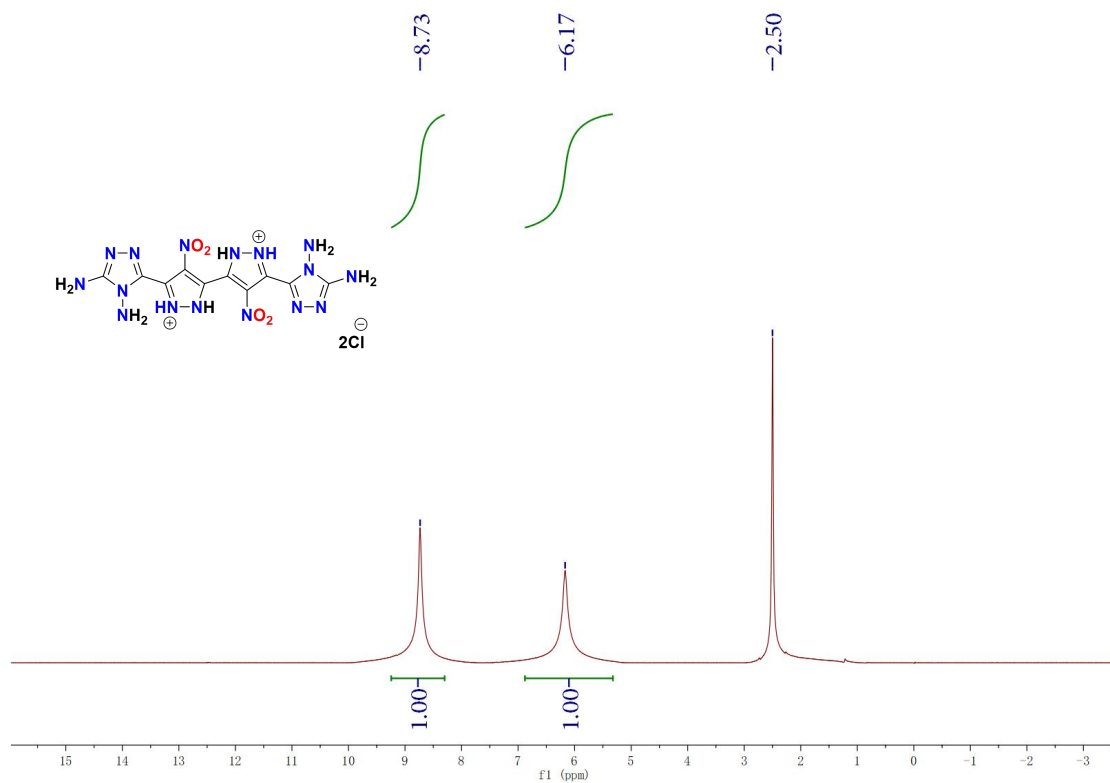

Fig. S6.  $^1\text{H}$  NMR spectrum of **5** in  $\text{DMSO-}d_6$ .

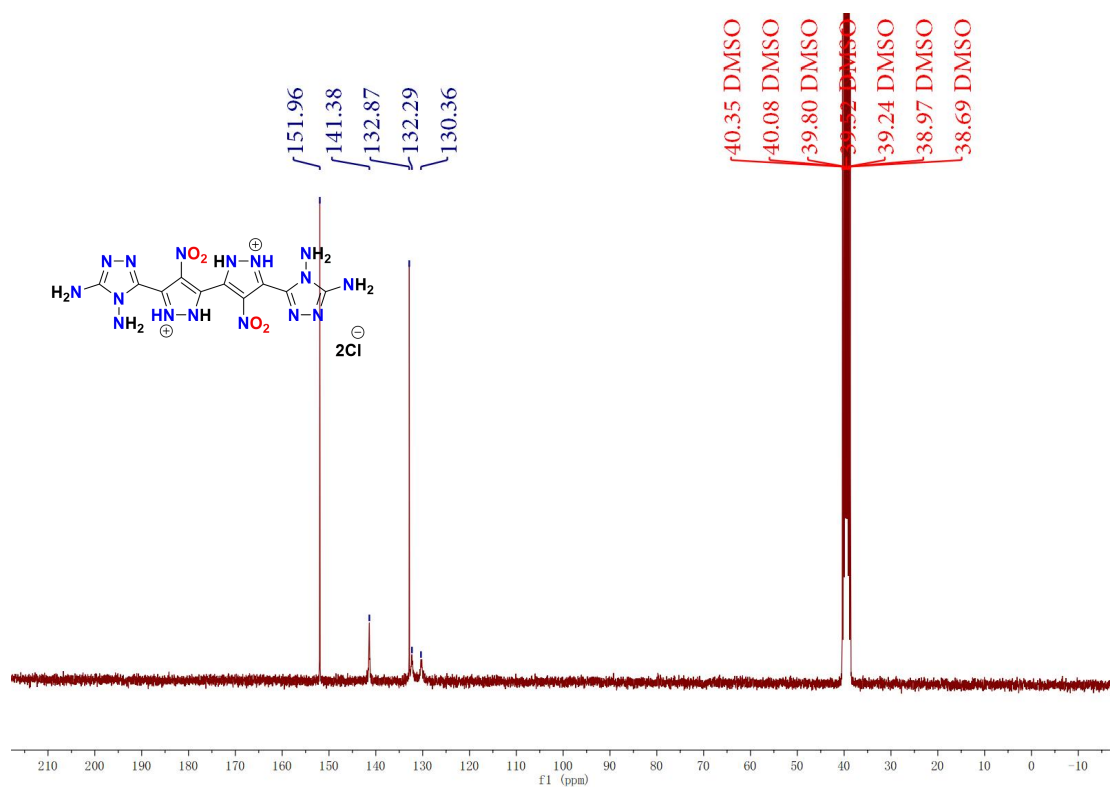

Fig. S7.  $^{13}\text{C}$  NMR spectrum of **5** in  $\text{DMSO-}d_6$ .

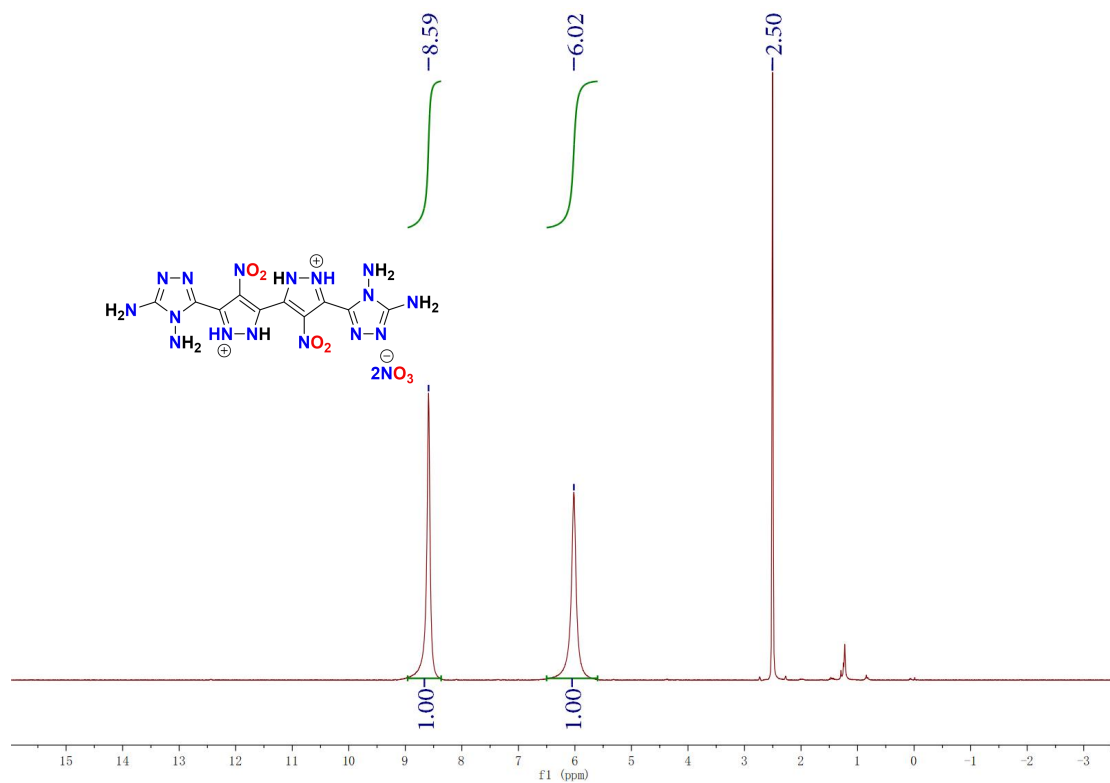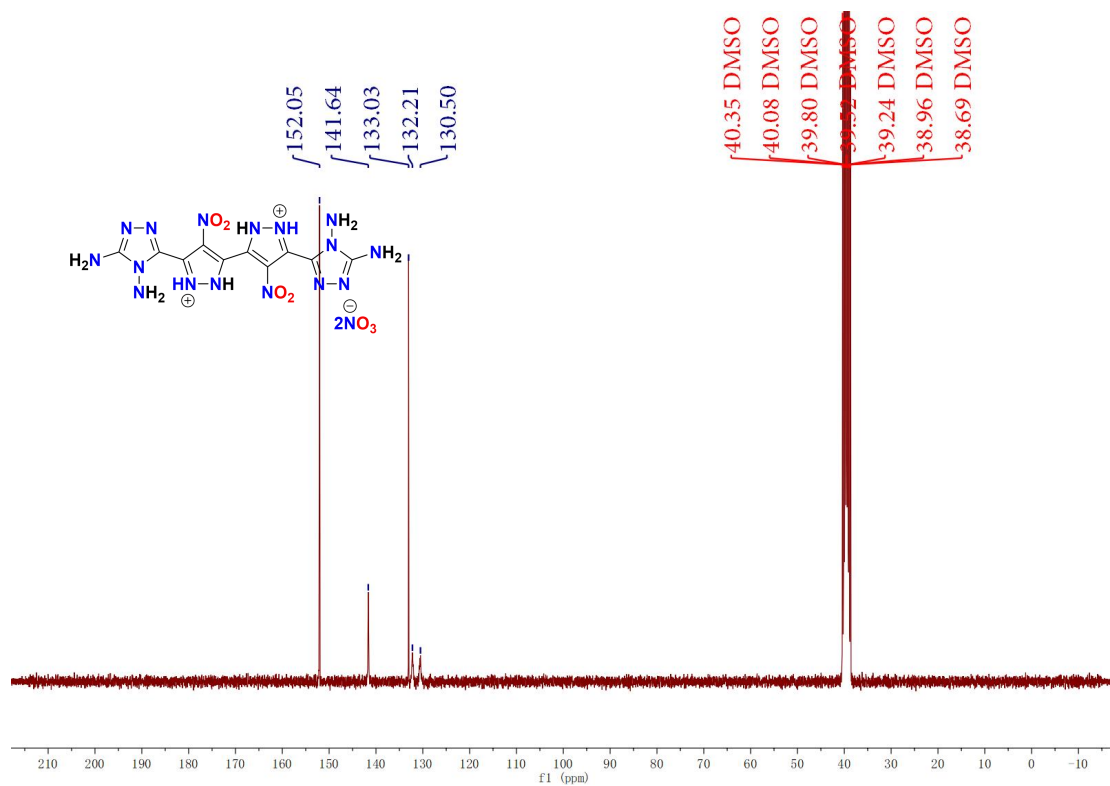

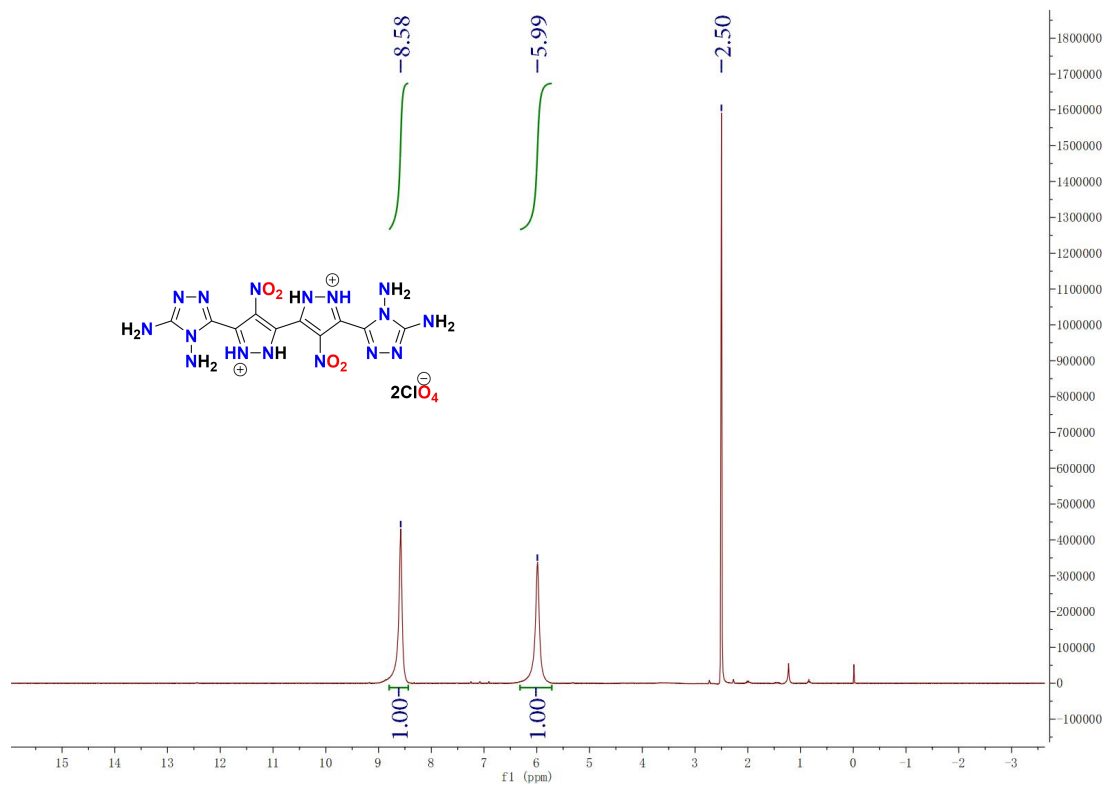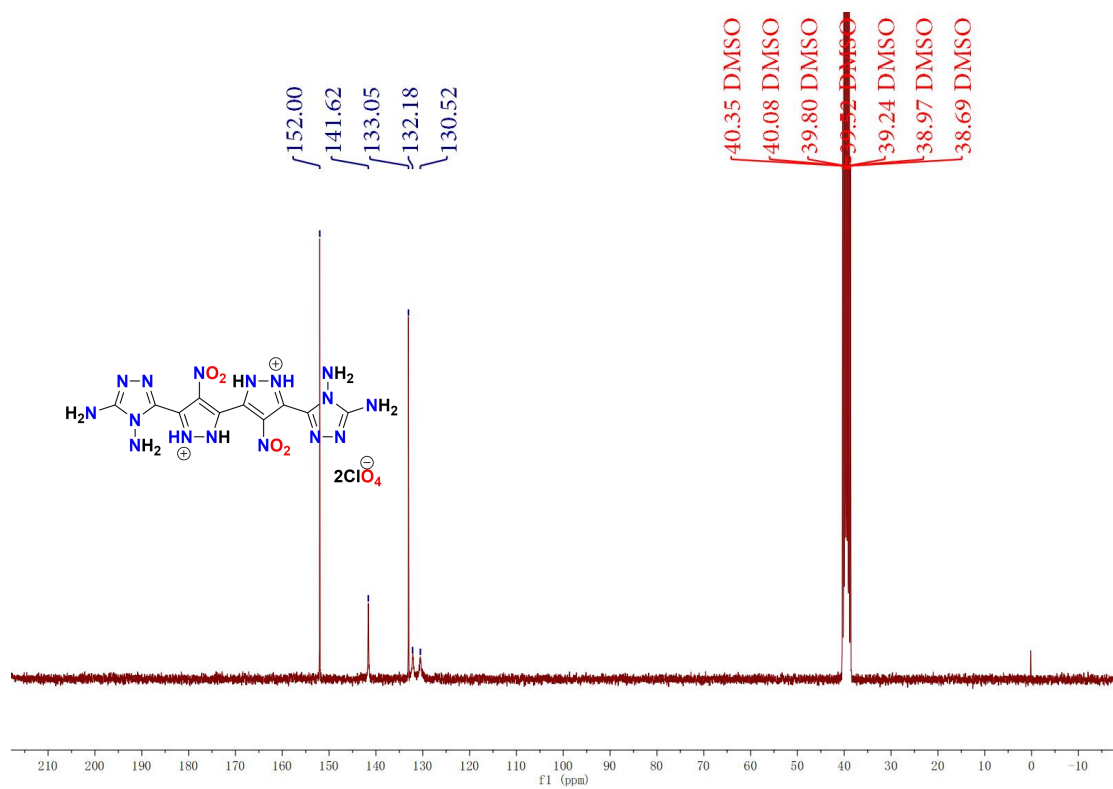

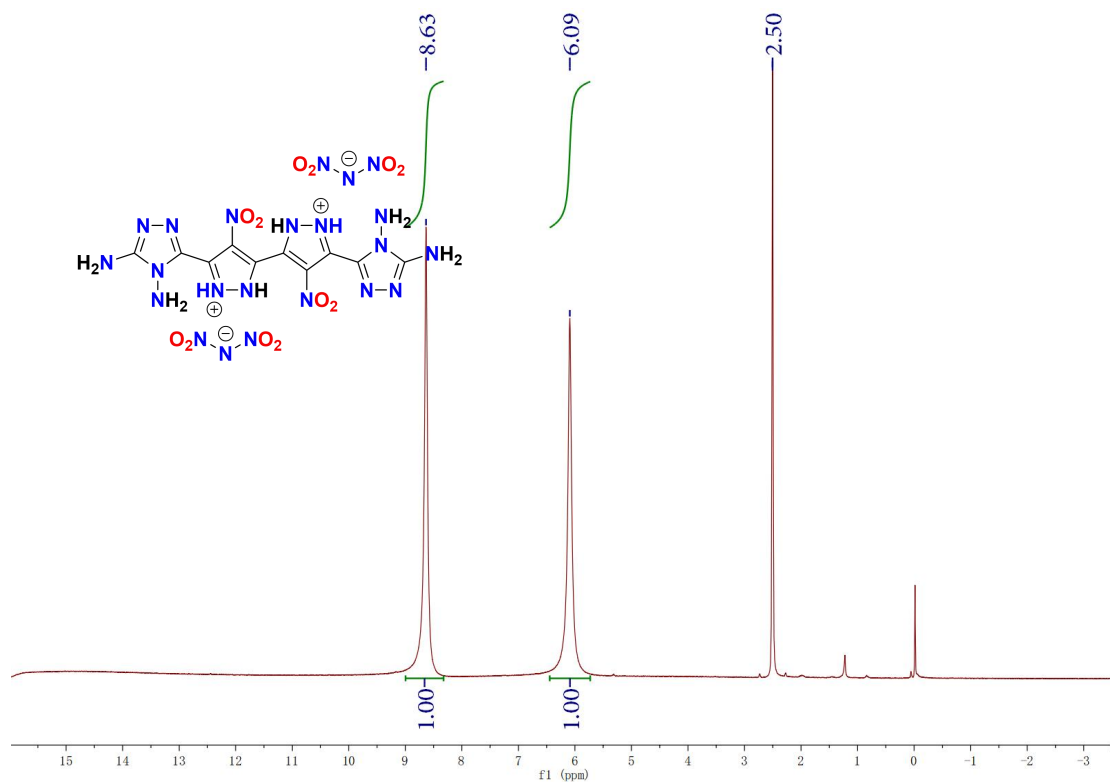

Fig. S12.  $^1\text{H}$  NMR spectrum of **8** in  $\text{DMSO-}d_6$ .

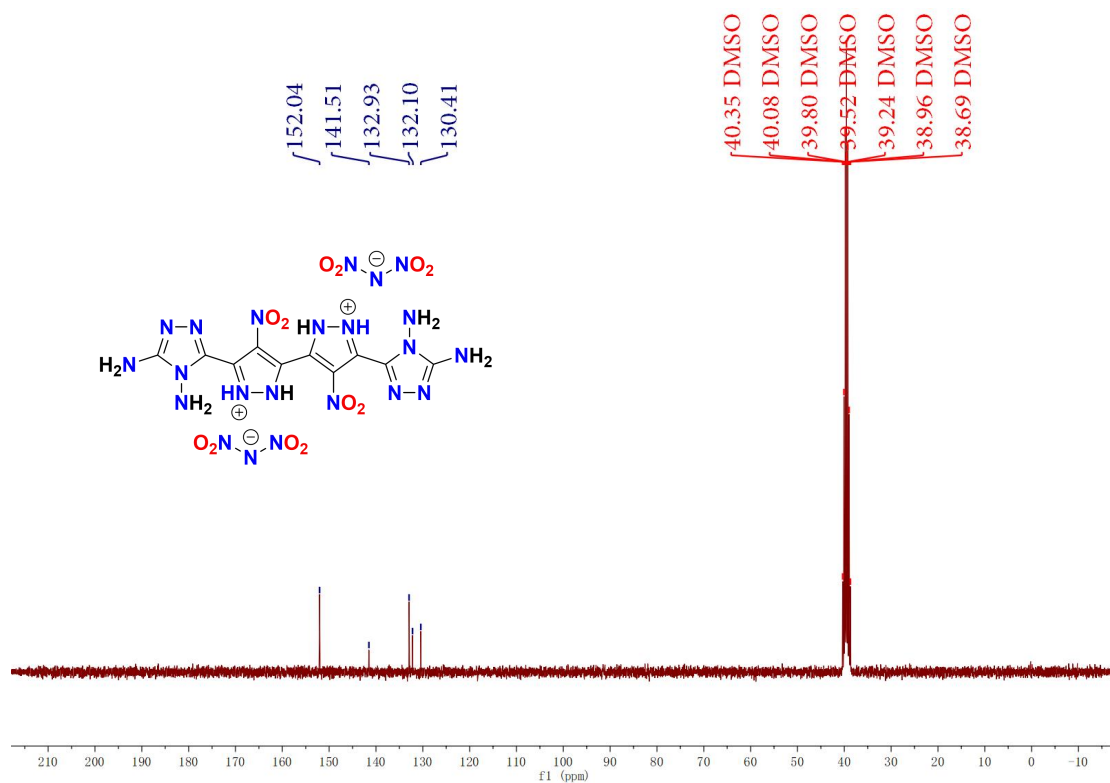

Fig. S13.  $^{13}\text{C}$  NMR spectrum of **8** in  $\text{DMSO-}d_6$ .

## 7. IR Spectrum of the prepared compounds

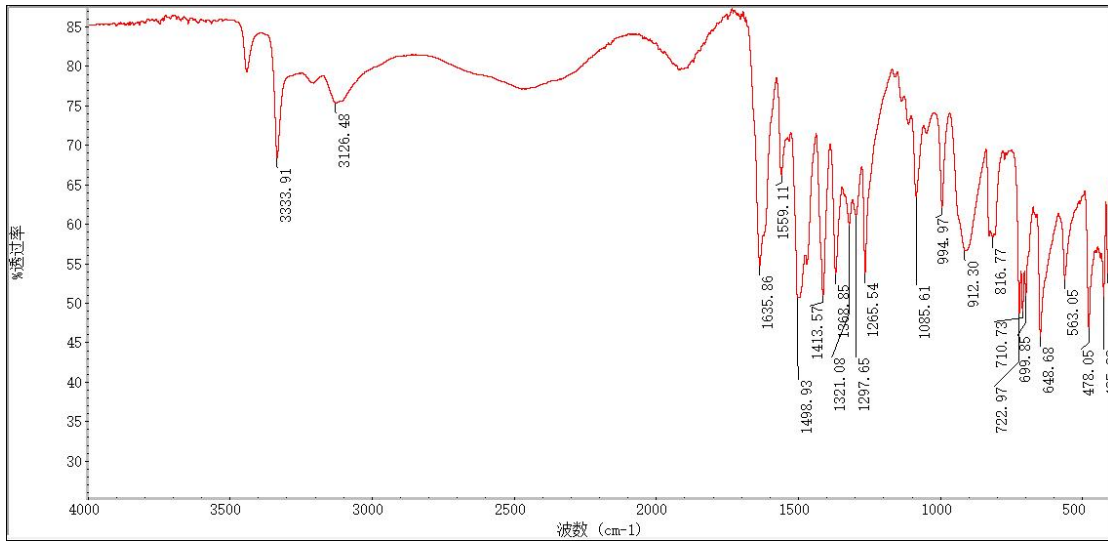

Fig. S12. IR Spectrum of 3.

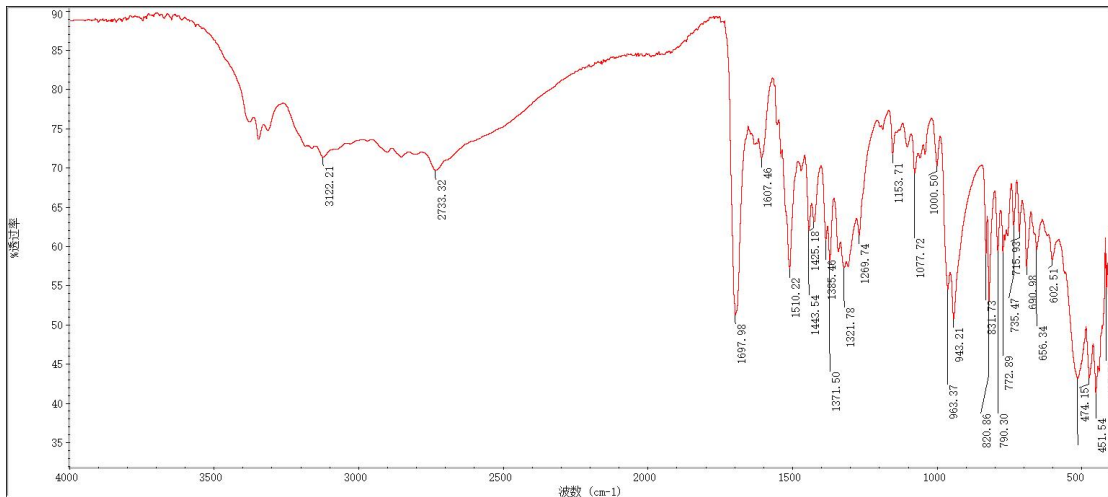

Fig. S13. IR Spectrum of 5.



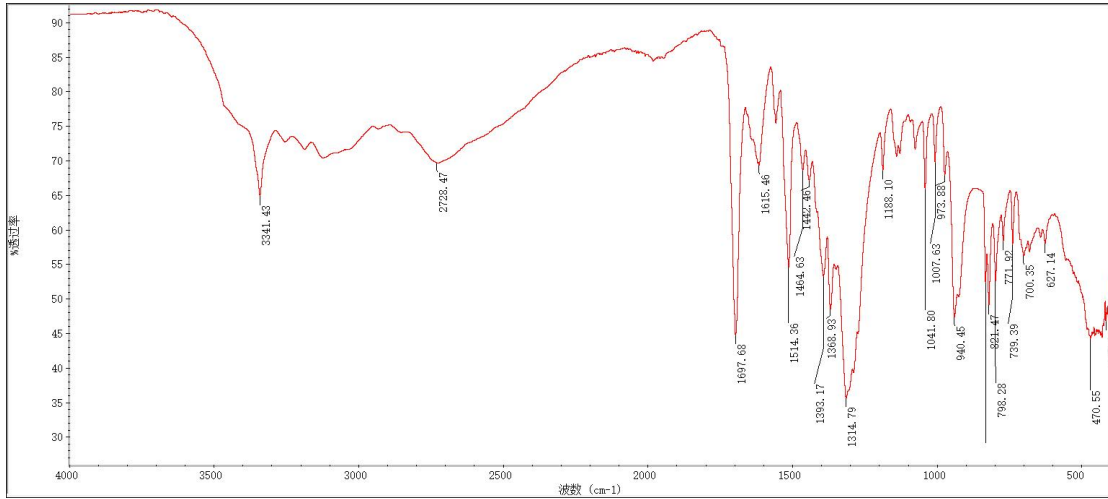

Fig. S14. IR Spectrum of 6.

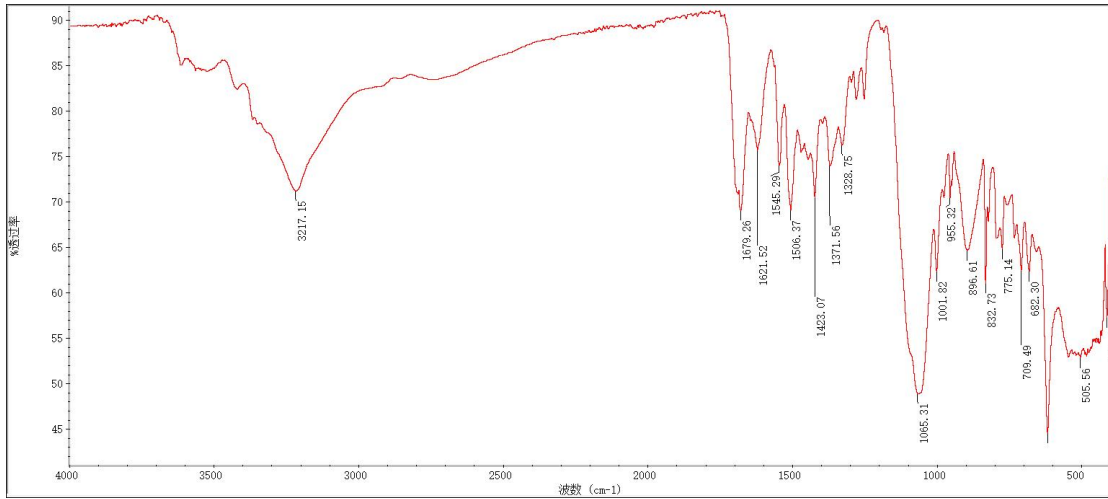

Fig. S16. IR Spectrum of 7.

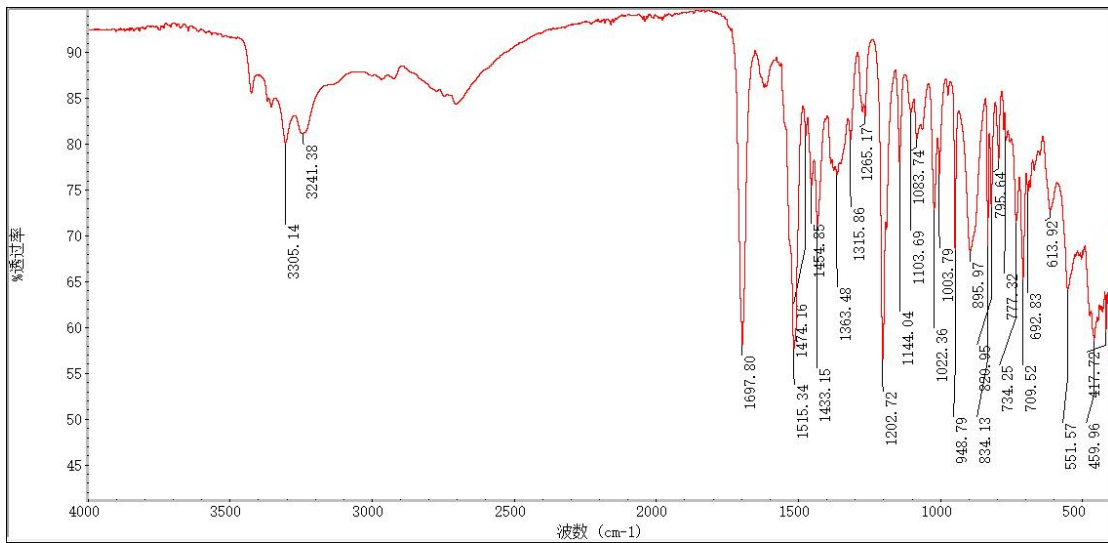

Fig. S15. IR Spectrum of 8.

## 8. References

- [1] Y. Tang, C. He, G. H. Imler, D. A. Parrish, J. M. Shreeve, *Chem. Comm.*, 75 (2018) 10566-10569.
- [2] M.J. Frisch, G.W. Trucks, H.B. Schlegel, G.E. Scuseria, M.A. Robb, J.R. Cheeseman, V.G. Zakrzewski, J.A. Montgomery, R.E. Stratmann, J.C. Burant, S. Dapprich, J.M. Millam, A.D. Daniels, K.N. Kudin, M.C. Strain, O. Farkas, J. Tomasi, V. Barone, M. Cossi, R. Cammi, B. Mennucci, C. Pomelli, C. Adamo, S. Clifford, J. Ochterski, G.A. Petersson, P.Y. Ayala, Q. Cui, K. Morokuma, D.K. Malick, A.D. Rabuck, K. Raghavachari, J.B. Foresman, J. Cioslowski, J.V. Ortiz, A.G. Baboul, B.B. Stefanov, G. Liu, A. Liashenko, P. Piskorz, I. Komaromi, R. Gomperts, R.L. Martin, D.J. Fox, T. Keith, M.A. Laham, C.Y. Peng, A. Nanayakkara, C. Gonzalez, M. Challacombe, P.M.W. Gill, B. Johnson, W. Chen, M.W. Wong, J.L. Andres, C. Gonzalez, M. Head-Gordon, E.S. Replogle, J.A. Pople, *Gaussian 09*, revision A. 01; Gaussian, Inc.: Wallingford, CT, 2009.
- [3] (a) A.D. Becke, *J. Chem. Phys.* 98 (1993) 5648–5652. (b) P.J. Stephens, F.J. Devlin, C.F. Chabalowski, M.J. Frisch, *J. Phys. Chem.* 98 (1994) 11623–11627.
- [4] P.C. Hariharan, J.A. Pople, *Theor. Chim. Acta.* 28 (1973) 213–222.
- [5] J.W. Ochterski, G.A. Petersson, J.A. Montgomery, *J. Chem. Phys.* 104 (1996) 2598–2619.
- [6] H.D.B. Jenkins, D. Tudeal, L. Glasser, *Inorg. Chem.* 41 (2002) 2364–2367.

- [7] Jenkins, H. D. B.; Tudela, D.; Glasser, L. Lattice Potential Energy Estimation for Complex Ionic Salts from Density Measurements. *Inorg. Chem.* 2002, 41 (9), 2364-2367.
- [8] Gao, H.; Ye, C.; Piekarski, C. M.; Shreeve, J. M. Computational Characterization of Energetic Salts. *J. Phys. Chem. C* 2007, 111 (28), 10718-10731.
- [9] Edward FC. Improved Prediction of Heats of Formation of Energetic Materials Using Quantum Mechanical Calculations. *J. Phys. Chem. A.* 2006, 110 (3), 1005-1013.
- [10] C. Ansbert, A. Pogrebnoi, T. Pogrebnaya, High energy density materials based on fluorinated bridged trinitromethyl azo triazole derivatives: a quantum chemical study of thermodynamic and energetic properties, *SN Applied Sciences* 2020, 2, 1843.
